# Supplementary material
Source: MDPI journal article supplement (https://www.mdpi.com/2075-163X/14/5/488)
Supplement: s1 [file s1]

**Table S1.** Representative analyses of core and rim of garnet and orthopyroxene (wt %) in metapelitic granulite of the Bunger Hills

| Rock                           | Grt-Sil-Crd |        | Grt-Crd |                  | Grt-Opx-Crd |                 |       |                  |       |       |
|--------------------------------|-------------|--------|---------|------------------|-------------|-----------------|-------|------------------|-------|-------|
| Sample                         | 67**        | 67**   | 75**    | 75*              | 15**        | 15**            | 61**  | 61**             | 61**  | 61**  |
| Mineral                        | Grt         | Grt    | Grt     | Grt              | Grt         | Grt             | Grt   | Grt              | Opx   | Opx   |
| Position                       | Core        | Rim    | Core    | Rim,<br>near Crd | Core        | Rim,<br>near Bt | Core  | Rim,<br>near Crd | Core  | Rim   |
| Analysis                       | 005         | 009    | 059     | 057              | 011         | 015             | 074   | 071              | 025   | 027   |
| Photo                          | S1,a        | S1,a   | S1,b    | S1,b             | S1,c        | S1,c            | S1,d  | S1,d             | S1,f  | S1,f  |
| SiO <sub>2</sub>               | 39.80       | 40.05  | 38.67   | 38.69            | 38.35       | 37.25           | 39.51 | 39.40            | 49.29 | 48.67 |
| TiO <sub>2</sub>               | 0.00        | 0.00   | 0.00    | 0.00             | 0.00        | 0.00            | 0.00  | 0.00             | 0.00  | 0.00  |
| Al <sub>2</sub> O <sub>3</sub> | 21.62       | 21.90  | 21.12   | 22.13            | 20.91       | 20.61           | 21.09 | 21.31            | 7.98  | 8.00  |
| FeO*                           | 27.11       | 26.25  | 28.34   | 28.91            | 30.78       | 33.80           | 25.15 | 25.06            | 20.31 | 20.45 |
| MnO                            | 0.78        | 0.85   | 2.62    | 3.20             | 0.66        | 1.09            | 2.16  | 2.44             | 0.59  | 0.43  |
| MgO                            | 10.28       | 10.25  | 8.22    | 7.35             | 8.08        | 5.27            | 10.30 | 10.13            | 21.22 | 21.73 |
| CaO                            | 0.85        | 0.70   | 1.03    | 1.08             | 0.41        | 0.37            | 1.07  | 1.09             | 0.06  | 0.00  |
| Na <sub>2</sub> O              | 0.00        | 0.00   | 0.00    | 0.00             | 0.00        | 0.00            | 0.00  | 0.00             | 0.00  | 0.00  |
| Total                          | 100.44      | 100.00 | 100.00  | 101.36           | 99.19       | 98.39           | 99.28 | 99.43            | 99.45 | 99.28 |
| Si                             | 3.035       | 3.051  | 3.014   | 2.986            | 3.019       | 3.013           | 3.035 | 3.046            | 1.827 | 1.810 |
| Al                             | 1.943       | 1.966  | 1.940   | 2.013            | 1.940       | 1.965           | 1.935 | 1.916            | 0.349 | 0.351 |
| Fe <sup>3+</sup>               |             |        |         |                  |             |                 |       |                  | 0.023 | 0.023 |
| Fe <sup>2+</sup>               | 1.729       | 1.672  | 1.847   | 1.866            | 2.026       | 2.286           | 1.615 | 1.621            | 0.625 | 0.625 |
| Mn                             | 0.050       | 0.055  | 0.173   | 0.209            | 0.044       | 0.075           | 0.159 | 0.141            | 0.019 | 0.014 |
| Mg                             | 1.168       | 1.164  | 0.955   | 0.845            | 0.948       | 0.635           | 1.163 | 1.183            | 1.172 | 1.204 |
| Ca                             | 0.069       | 0.057  | 0.086   | 0.089            | 0.035       | 0.032           | 0.090 | 0.088            | 0.002 | 0.000 |
| Total                          | 7.994       | 7.965  | 8.015   | 8.008            | 8.012       | 8.006           | 7.997 | 7.995            | 3.999 | 4.015 |
| X <sub>Alm</sub>               | 0.573       | 0.567  | 0.603   | 0.620            | 0.664       | 0.755           | 0.534 | 0.533            |       |       |
| X <sub>Py</sub>                | 0.387       | 0.395  | 0.312   | 0.281            | 0.310       | 0.210           | 0.390 | 0.384            |       |       |
| X <sub>Sps</sub>               | 0.017       | 0.019  | 0.057   | 0.007            | 0.014       | 0.025           | 0.047 | 0.053            |       |       |
| X <sub>Grs</sub>               | 0.023       | 0.019  | 0.028   | 0.003            | 0.012       | 0.011           | 0.029 | 0.030            |       |       |
| X <sub>En</sub>                |             |        |         |                  |             |                 |       |                  | 0.651 | 0.654 |
| X <sub>Fs</sub>                |             |        |         |                  |             |                 |       |                  | 0.349 | 0.346 |
| X <sub>Al</sub> <sup>M1</sup>  |             |        |         |                  |             |                 |       |                  | 0.177 | 0.153 |

Note: \* analyses obtained using JEOL JSM-7001F SEM at SPMU, \*\* using JEOL JSM-6510LA SEM at IPGG RAS. FeO\*, total iron. Structural formulae normalized to 12 oxygens (garnet), 4 cations and 12 charges (orthopyroxene). Garnet:  $X_{Alm} = \text{Fe}/(\text{Fe} + \text{Mg} + \text{Mn} + \text{Ca})$ ,  $X_{Py} = \text{Mg}/(\text{Fe} + \text{Mg} + \text{Mn} + \text{Ca})$ ,  $X_{Sps} = \text{Mn}/(\text{Fe} + \text{Mg} + \text{Mn} + \text{Ca})$ ,  $X_{Grs} = \text{Ca}/(\text{Fe} + \text{Mg} + \text{Mn} + \text{Ca})$ . Orthopyroxene:  $X_{En} = \text{Mg}/(\text{Fe} + \text{Mg})$ ,  $X_{Fs} = \text{Fs}/(\text{Fe} + \text{Mg})$ ,  $X_{Al}^{M1} = \text{Si} - (2 - \text{Al})$ .

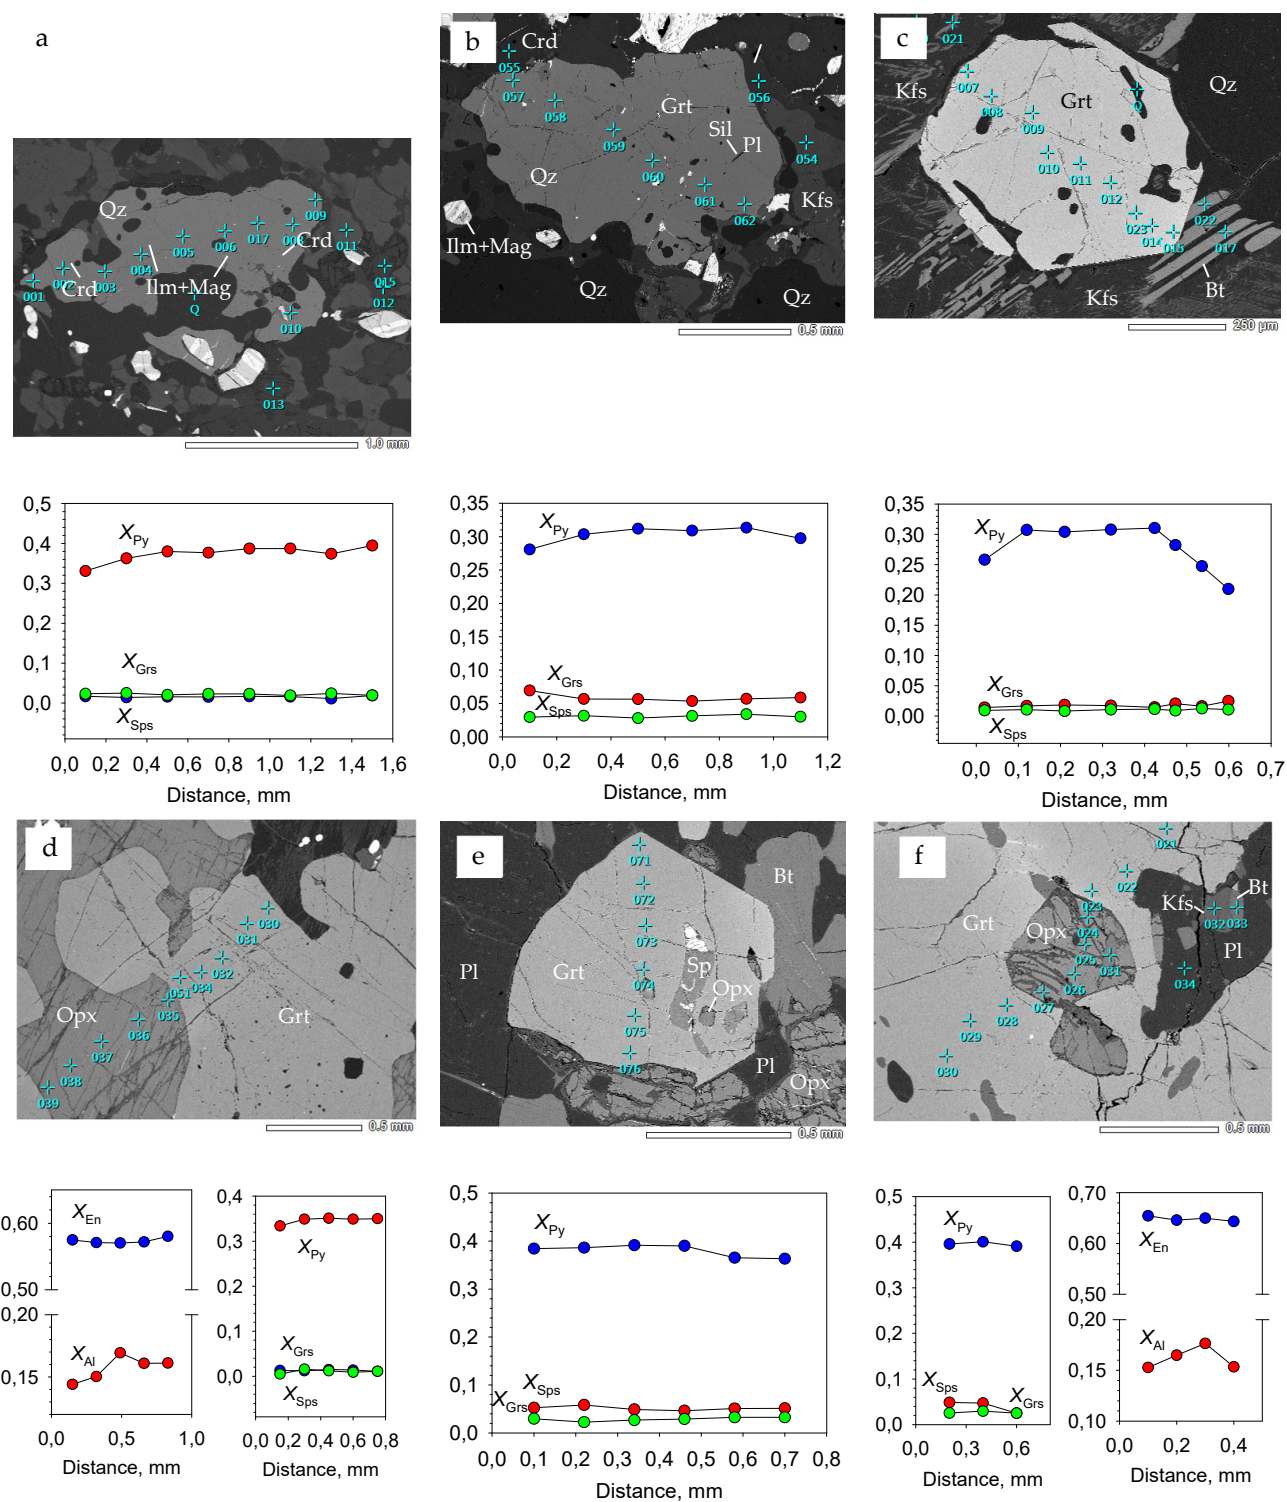

**Figure S1.** Back-scattered electron (BSE) images of garnet and orthopyroxene and rim-core-rim zoning profiles. (a) Garnet (sample 67). (b) Garnet (sample 75). (c) Garnet (sample 15). (d) Garnet and orthopyroxene (sample 15). (e) Garnet (sample 61). (f) Garnet and orthopyroxene (sample 61).

**Table S2.** Representative analyses of cordierite (wt %) in metapelitic granulite of the Bonger Hills

| <b>Rock</b>                    | <b>Grt-Sil-Crd</b> |             |             | <b>Grt-Crd</b> |             | <b>Grt-Opx</b> |             |             |             |
|--------------------------------|--------------------|-------------|-------------|----------------|-------------|----------------|-------------|-------------|-------------|
| <b>Sample</b>                  | <b>55**</b>        | <b>67**</b> | <b>67**</b> | <b>75**</b>    | <b>78**</b> | <b>61**</b>    | <b>63**</b> | <b>63**</b> | <b>67**</b> |
| <b>Analysis</b>                | <b>012</b>         | <b>013</b>  | <b>015</b>  | <b>014</b>     | <b>077</b>  | <b>054</b>     | <b>042</b>  | <b>101</b>  | <b>015</b>  |
| SiO <sub>2</sub>               | 46.46              | 46.98       | 49.31       | 48.95          | 48.47       | 49.37          | 48.04       | 48.77       | 49.31       |
| Al <sub>2</sub> O <sub>3</sub> | 32.58              | 32.39       | 33.50       | 32.16          | 32.62       | 33.32          | 31.61       | 32.14       | 33.50       |
| FeO*                           | 3.95               | 4.19        | 4.78        | 4.54           | 3.65        | 3.76           | 3.84        | 3.38        | 4.78        |
| MnO                            | 0.00               | 0.00        | 0.00        | 0.12           | 0.08        | 0.00           | 0.02        | 0.00        | 0.00        |
| MgO                            | 10.58              | 9.73        | 10.33       | 10.53          | 10.44       | 11.02          | 11.22       | 11.49       | 10.33       |
| CaO                            | 0.00               | 0.00        | 0.00        | 0.00           | 0.00        | 0.00           | 0.00        | 0.00        | 0.00        |
| Na <sub>2</sub> O              | 0.00               | 0.00        | 0.00        | 0.00           | 0.00        | 0.00           | 0.00        | 0.00        | 0.00        |
| K <sub>2</sub> O               | 0.00               | 0.00        | 0.00        | 0.00           | 0.00        | 0.00           | 0.00        | 0.00        | 0.00        |
| Total                          | 93.57              | 93.29       | 97.92       | 96.30          | 95.26       | 97.47          | 94.73       | 95.78       | 97.92       |
| Si                             | 4.931              | 4.997       | 5.008       | 5.054          | 5.035       | 5.014          | 5.030       | 5.036       | 5.008       |
| Al                             | 4.076              | 4.061       | 4.010       | 3.913          | 3.994       | 3.989          | 3.901       | 3.912       | 4.010       |
| Fe                             | 0.351              | 0.373       | 0.406       | 0.392          | 0.317       | 0.319          | 0.336       | 0.292       | 0.406       |
| Mn                             | 0.000              | 0.000       | 0.000       | 0.010          | 0.007       | 0.000          | 0.002       | 0.000       | 0.000       |
| Mg                             | 1.674              | 1.542       | 1.563       | 1.620          | 1.616       | 1.668          | 1.751       | 1.768       | 1.563       |
| Na                             | 0.000              | 0.000       | 0.000       | 0.000          | 0.000       | 0.000          | 0.000       | 0.000       | 0.000       |
| K                              | 0.000              | 0.000       | 0.000       | 0.000          | 0.000       | 0.000          | 0.000       | 0.000       | 0.000       |
| Total                          | 11.032             | 10.973      | 10.987      | 10.990         | 10.969      | 10.990         | 11.020      | 11.008      | 10.987      |
| Mg#                            | 0.83               | 0.81        | 0.79        | 0.81           | 0.84        | 0.84           | 0.84        | 0.86        | 0.79        |

Note: \*\* analyses obtained using JEOL JSM-6510LA SEM at IPGG RAS. FeO\*, total iron. Structural formulae normalized to 18 oxygens. Mg# = Mg/(Mg +Fe).

**Table S3.** Representative analyses of biotite (wt %) in metapelitic granulite of the Bunker Hills and the results of thermobarometry calculations

| Rock                           | Grt-Sil, Grt-Sil-Crd |              |             |        |        | Grt-Crd        |                | Grt-Opx |                  |
|--------------------------------|----------------------|--------------|-------------|--------|--------|----------------|----------------|---------|------------------|
| Sample                         | 2a*                  | 2a*          | 2a*         | 11a*   | 67**   | 78**           | 78**           | 61**    | 63**             |
| Position                       | In Grt               | Matrix, core | Matrix, rim | Matrix | In Grt | Around Crn-Mag | With late Sill | In Opx  | Q-Bt symplectite |
| Analysis                       | 10                   | 1            | 3           | 025    | 032    | 081            | 129            | 031     | 030              |
| Photo                          | S2,a                 | S2,c         | S2,c        | S2,d   | S2,e   | S2,f           | S2,g           | S2,h    | S2,i             |
| SiO <sub>2</sub>               | 39.57                | 38.96        | 38.91       | 38.78  | 39.05  | 37.51          | 37.92          | 37.14   | 37.41            |
| TiO <sub>2</sub>               | 5.96                 | 3.50         | 3.18        | 4.51   | 4.93   | 2.96           | 3.31           | 5.38    | 4.07             |
| Al <sub>2</sub> O <sub>3</sub> | 16.11                | 15.50        | 16.52       | 14.79  | 15.55  | 17.71          | 17.85          | 14.98   | 15.74            |
| FeO*                           | 8.54                 | 13.21        | 11.67       | 10.94  | 9.73   | 11.45          | 12.63          | 10.67   | 10.37            |
| MnO                            | 0.00                 | 0.00         | 0.00        | 0.00   | 0.00   | 0.00           | 0.00           | 0.00    | 0.07             |
| MgO                            | 16.90                | 14.05        | 15.34       | 17.06  | 16.57  | 16.01          | 15.11          | 15.34   | 15.86            |
| CaO                            | 0.00                 | 0.00         | 0.00        | 0.00   | 0.00   | 0.00           | 0.00           | 0.00    | 0.00             |
| Na <sub>2</sub> O              | 0.00                 | 0.00         | 0.00        | 0.00   | 0.22   | 0.00           | 0.06           | 0.00    | 0.00             |
| K <sub>2</sub> O               | 10.03                | 10.16        | 9.10        | 10.07  | 10.39  | 10.42          | 10.01          | 10.76   | 10.51            |
| Total                          | 97.11                | 95.38        | 94.72       | 96.15  | 96.44  | 96.06          | 96.89          | 94.27   | 94.03            |
| Si                             | 2.802                | 2.875        | 2.849       | 2.816  | 2.813  | 2.735          | 2.746          | 2.770   | 2.783            |
| Al <sup>IV</sup>               | 1.198                | 1.125        | 1.151       | 1.184  | 1.187  | 1.265          | 1.254          | 1.230   | 1.217            |
| Al <sup>VI</sup>               | 0.147                | 0.223        | 0.274       | 0.082  | 0.134  | 0.257          | 0.270          | 0.086   | 0.164            |
| Ti                             | 0.318                | 0.194        | 0.175       | 0.246  | 0.267  | 0.162          | 0.180          | 0.302   | 0.228            |
| Fe                             | 0.506                | 0.815        | 0.715       | 0.664  | 0.586  | 0.698          | 0.765          | 0.665   | 0.645            |
| Mn                             | 0.000                | 0.000        | 0.000       | 0.000  | 0.000  | 0.000          | 0.000          | 0.000   | 0.004            |
| Mg                             | 1.784                | 1.545        | 1.674       | 1.846  | 1.779  | 1.740          | 1.631          | 1.705   | 1.759            |
| Na                             | 0.000                | 0.000        | 0.000       | 0.000  | 0.031  | 0.000          | 0.008          | 0.000   | 0.000            |
| K                              | 0.907                | 0.956        | 0.850       | 0.933  | 0.955  | 0.969          | 0.925          | 1.024   | 0.998            |
| Total                          | 7.661                | 7.733        | 7.688       | 7.771  | 7.752  | 7.826          | 7.779          | 7.782   | 7.797            |
| Mg#                            | 0.78                 | 0.65         | 0.70        | 0.74   | 0.75   | 0.71           | 0.68           | 0.72    | 0.73             |
| T <sub>H05</sub> , °C          | 738                  | 668          | 651         | 703    | 773    | 700            | 705            | 731     | 692              |

Note: \* analyses obtained using JEOL JSM-7001F SEM at SPMU, \*\* using JEOL JSM-6510LA SEM at IPGG RAS. FeO\*, total iron. Structural formulae normalized to 11 oxygens. Mg# = Mg/(Mg + Fe). T<sub>H05</sub>, °C, temperature calculated with Henry et al. (2005) Ti-in-biotite geothermometer [38].

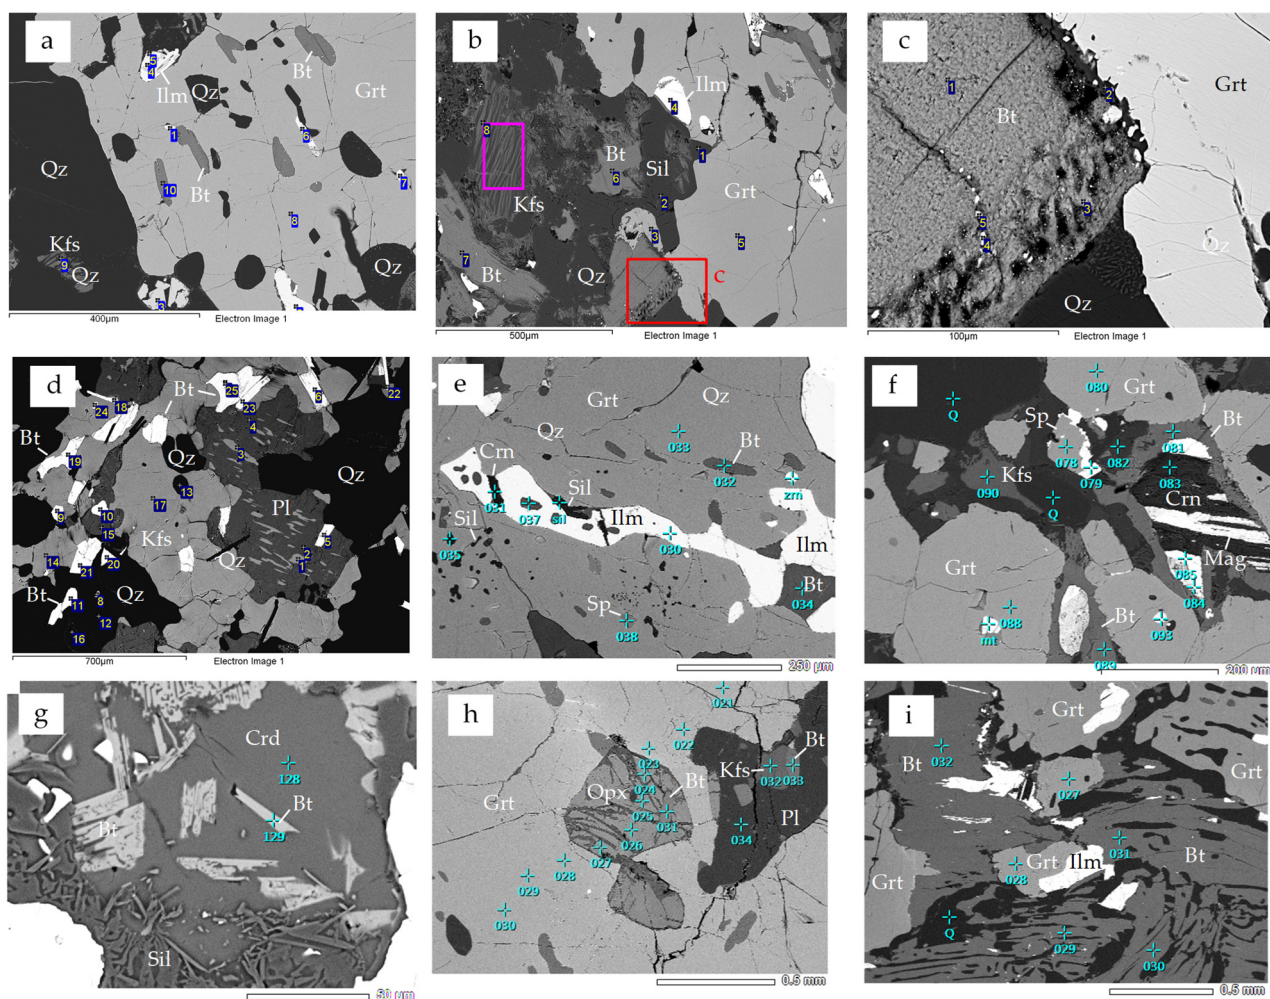

**Figure S2.** Back-scattered electron (BSE) images showing occurrences of analyzed biotite in granulite. (a) Biotite inclusions in garnet (sample 2a). (b) Biotite in the matrix (sample 2a). (c) Biotite replacing garnet rim. Enlarged detail of the previous photo. (d) Biotite in the matrix (sample 11a). (e) Biotite inclusions in garnet (sample 67). (f) Biotite reaction rim around corundum-ilmenite-magnetite intergrowth (sample 78). (g) Acicular sillimanite and biotite replacing cordierite along grain boundaries (sample 78). (h) Biotite inclusions in orthopyroxene (sample 61). (i) Quartz-biotite symplectite (sample 63). .

**Table S4.** Representative analyses of K-feldspar and plagioclase (wt %) in metapelitic granulite of the Bunger Hills

| Rock                           | Grt-Sil-Crd |          |         |        |          |        |          | Grt-Crd    | Grt-Opx-Crd |          |
|--------------------------------|-------------|----------|---------|--------|----------|--------|----------|------------|-------------|----------|
| Sample                         | 2a*         | 2a*      | 2a*     | 11a*   | 11a*     | 11a*   | 11a*     | 75**       | 15*         | 15*      |
| Mineral                        | Kfs         | Pl       | Msp     | Kfs    | Pl       | Pl     | Kfs      | Pl         | Ab          | Kfs      |
| Domain                         | Host        | Lamellae | Re-int. | Host   | Lamellae | Host   | Lamellae | Host       | Host        | Lamellae |
| Position                       | Matrix      | Matrix   | Matrix  | Matrix | Matrix   | Matrix | Matrix   | Mantled Sp | Matrix      | Matrix   |
| Analysis                       | 3           | 4        | 6       | 2      | 1        | 2      | 1        | 65         | 2           | 3        |
| Photo                          | S3,a        | S3,a     | S3,a    | S3,b   | S3,b     | S3,c   | S3,c     | S3,d       | S3,f        | S3,f     |
| SiO <sub>2</sub>               | 65.54       | 69.97    | 67.49   | 64.58  | 67.44    | 55.14  | 64.65    | 59.49      | 65.88       | 64.43    |
| Al <sub>2</sub> O <sub>3</sub> | 17.45       | 18.81    | 18.14   | 18.20  | 19.71    | 27.72  | 18.58    | 25.49      | 20.55       | 19.72    |
| FeO*                           | 0.00        | 0.00     | 0.00    | 0.00   | 0.00     | 0.00   | 0.00     | 0.00       | 0.00        | 0.00     |
| CaO                            | 0.00        | 0.00     | 0.00    | 0.36   | 0.44     | 10.47  | 0.00     | 7.58       | 1.44        | 0.84     |
| Na <sub>2</sub> O              | 1.52        | 10.53    | 6.78    | 1.43   | 11.40    | 6.31   | 0.83     | 7.48       | 11.91       | 4.19     |
| K <sub>2</sub> O               | 13.42       | 0.04     | 6.09    | 14.94  | 0.40     | 0.00   | 15.55    | 0.00       | 0.08        | 10.39    |
| BaO                            | 1.28        | 0.11     | 0.79    | 00.00  | 0.00     | 0.00   | 0.00     | 0.00       | 0.00        | 0.00     |
| Total                          | 99.21       | 99.46    | 99.29   | 99.51  | 99.39    | 99.64  | 99.61    | 100.04     | 99.87       | 99.57    |
| Si                             | 3.040       | 3.051    | 3.036   | 2.992  | 2.973    | 2.497  | 2.992    | 2.653      | 2.908       | 2.932    |
| Al                             | 0.954       | 0.967    | 0.962   | 0.994  | 1.024    | 1.480  | 1.013    | 1.340      | 1.069       | 1.058    |
| Fe                             | 0.000       | 0.000    | 0.000   | 0.000  | 0.000    | 0.000  | 0.000    | 0.000      | 0.000       | 0.000    |
| Ca                             | 0.000       | 0.000    | 0.000   | 0.018  | 0.021    | 0.508  | 0.000    | 0.362      | 0.068       | 0.041    |
| Na                             | 0.137       | 0.891    | 0.592   | 0.129  | 0.974    | 0.554  | 0.074    | 0.647      | 1.020       | 0.370    |
| K                              | 0.794       | 0.002    | 0.349   | 0.884  | 0.022    | 0.000  | 0.918    | 0.000      | 0.004       | 0.603    |
| Ba                             | 0.023       | 0.002    | 0.014   | 0.000  | 0.000    | 0.000  | 0.000    | 0.000      | 0.000       | 0.000    |
| Total                          | 4.948       | 4.913    | 4.953   | 5.017  | 5.014    | 5.039  | 4.997    | 5.001      | 5.069       | 5.015    |
| X <sub>An</sub>                | 0.00        | 0.00     | 0.00    | 0.02   | 0.02     | 0.48   | 0.00     | 0.36       | 0.06        | 0.04     |
| X <sub>Ab</sub>                | 0.15        | 1.00     | 0.63    | 0.12   | 0.96     | 0.52   | 0.07     | 0.64       | 0.93        | 0.36     |
| X <sub>Ort</sub>               | 0.85        | 0.00     | 0.37    | 0.86   | 0.02     | 0.00   | 0.93     | 0.00       | 0.01        | 0.60     |

Note: \* analyses obtained using JEOL JSM-7001F SEM at SPMU, \*\* using JEOL JSM-6510LA SEM at IPGG RAS. Msp, mesoperthite. FeO\*, total iron. Structural formulae normalized to 8 oxygens.  $X_{An} = Ca/(Ca + Na + K)$ ,  $X_{Ab} = Na/(Ca + Na + K)$ ,  $X_{Ort} = K/(Ca + Na + K)$ .



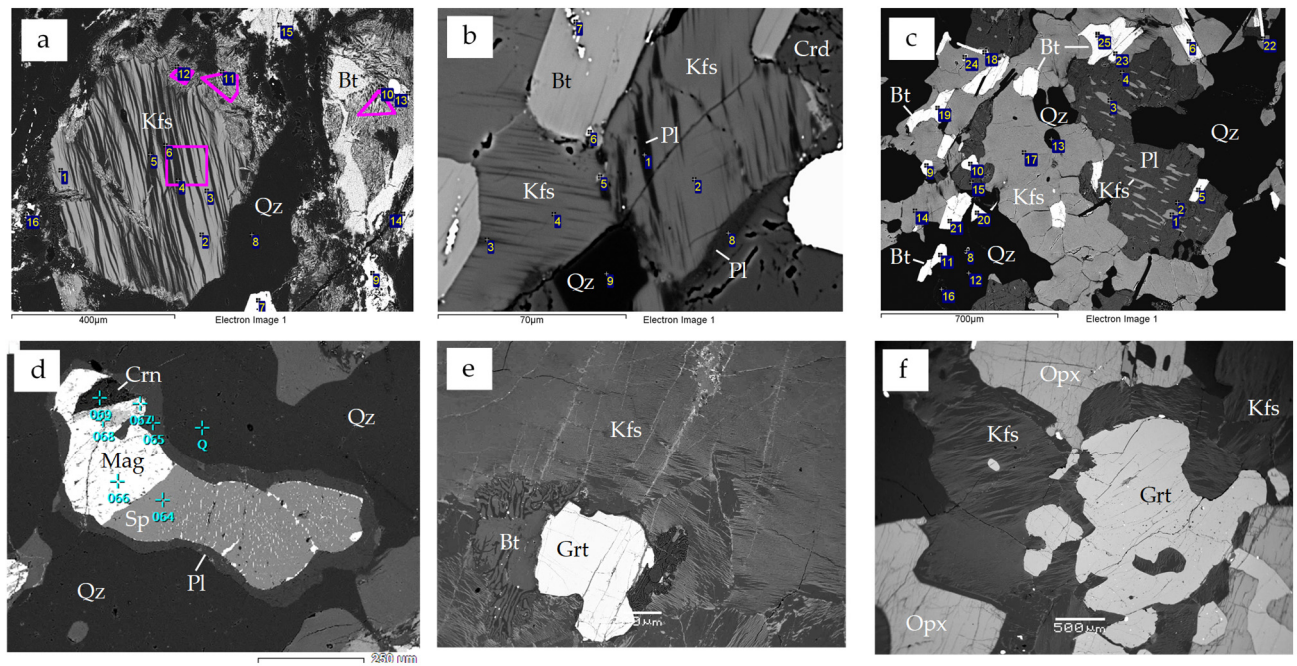

**Figure S3.** Back-scattered electron (BSE) images showing occurrences of analyzed feldspars in granulite. (a) Mesoperthite (sample 2a). (b) Mesoperthite (sample 11a). (c) Antiperthitic plagioclase (sample 11a). (d) Plagioclase mantled spinel-magnetite-ilmenite intergrowth (sample 75). (e) Mesoperthite (sample 15). (f) Mesoperthite (sample 15).

Table S5. Representative analyses of spinel (wt %) in metapelitic granulite of the Bunger Hills

| Rock                           | Grt-Sil-Crd |        |        | Grt-Crd |        |        |        | Grt-Opx-Crd |        |        |
|--------------------------------|-------------|--------|--------|---------|--------|--------|--------|-------------|--------|--------|
| Sample                         | 11a*        | 55**   | 67**   | 75**    | 75**   | 78**   | 78**   | 61**        | 61**   | 63**   |
| Position                       | Matrix      | Matrix | In Grt | In Grt  | Matrix | Matrix | In Grt | In Crd      | In Crd | In Grt |
| Analysis                       | 3           | 78     | 042    | 010     | 013    | 078    | 112    | 009         | 012    | 015    |
| Photo                          | S4,a        | S4,b   | S4,c   | S4,d    | S4,d   | S4,e   | S4,f   | S4,g        | S4,h   | S4,i   |
| SiO <sub>2</sub>               | 0.00        | 0.00   | 0.00   | 0.38    | 0.44   | 0.63   | 0.59   | 0.86        | 0.53   | 0.61   |
| TiO <sub>2</sub>               | 0.00        | 0.00   | 0.00   | 0.00    | 0.00   | 0.00   | 0.00   | 0.00        | 0.00   | 0.00   |
| Al <sub>2</sub> O <sub>3</sub> | 56.02       | 59.26  | 57.87  | 61.79   | 59.06  | 58.70  | 61.10  | 55.91       | 57.39  | 58.50  |
| Cr <sub>2</sub> O <sub>3</sub> | 2.39        | 1.51   | 1.36   | 0.45    | 0.72   | 0.35   | 0.22   | 1.55        | 0.76   | 0.31   |
| FeO*                           | 23.42       | 26.44  | 27.79  | 25.93   | 30.78  | 23.55  | 25.03  | 28.26       | 26.55  | 23.53  |
| MnO                            | 0.00        | 0.00   | 0.00   | 0.09    | 0.23   | 0.00   | 0.00   | 0.49        | 0.62   | 0.00   |
| MgO                            | 4.16        | 8.91   | 9.12   | 11.55   | 9.01   | 6.82   | 9.80   | 9.15        | 10.26  | 12.08  |
| ZnO                            | 13.63       | 2.49   | 2.97   | 0.94    | 0.67   | 9.96   | 3.14   | 2.21        | 2.10   | 2.79   |
| Total                          | 99.62       | 98.61  | 99.11  | 101.13  | 100.91 | 100.01 | 99.88  | 98.43       | 98.21  | 97.82  |
| Si                             | 0.000       | 0.000  | 0.000  | 0.010   | 0.012  | 0.018  | 0.016  | 0.024       | 0.015  | 0.017  |
| Ti                             | 0.000       | 0.000  | 0.000  | 0.000   | 0.000  | 0.000  | 0.000  | 0.000       | 0.000  | 0.000  |
| Al                             | 1.909       | 1.935  | 1.889  | 1.930   | 1.891  | 1.933  | 1.953  | 1.842       | 1.872  | 1.888  |
| Cr                             | 0.055       | 0.033  | 0.030  | 0.009   | 0.015  | 0.008  | 0.005  | 0.034       | 0.017  | 0.007  |
| Fe <sup>3+</sup>               | 0.036       | 0.032  | 0.081  | 0.041   | 0.070  | 0.023  | 0.010  | 0.075       | 0.081  | 0.072  |
| B                              | 2.000       | 2.000  | 2.000  | 1.990   | 1.988  | 1.982  | 1.984  | 1.975       | 1.985  | 1.984  |
| Fe <sup>2+</sup>               | 0.530       | 0.581  | 0.563  | 0.534   | 0.629  | 0.528  | 0.557  | 0.586       | 0.534  | 0.467  |
| Mn                             | 0.000       | 0.000  | 0.000  | 0.002   | 0.005  | 0.000  | 0.000  | 0.012       | 0.015  | 0.000  |
| Mg                             | 0.179       | 0.368  | 0.376  | 0.456   | 0.365  | 0.284  | 0.396  | 0.381       | 0.423  | 0.493  |
| Zn                             | 0.291       | 0.051  | 0.061  | 0.018   | 0.013  | 0.206  | 0.063  | 0.046       | 0.043  | 0.056  |
| A                              | 1.000       | 1.000  | 1.000  | 1.010   | 1.012  | 1.018  | 1.016  | 1.025       | 1.015  | 1.016  |
| Total                          | 3.000       | 3.000  | 3.000  | 3.000   | 3.000  | 3.000  | 3.000  | 3.000       | 3.000  | 3.000  |
| X <sub>Hc</sub>                | 0.53        | 0.58   | 0.56   | 0.02    | 0.02   | 0.48   | 0.00   | 0.58        | 0.53   | 0.46   |
| X <sub>Sp</sub>                | 0.17        | 0.37   | 0.38   | 0.12    | 0.96   | 0.52   | 0.07   | 0.38        | 0.42   | 0.49   |
| X <sub>Ghn</sub>               | 0.30        | 0.05   | 0.06   | 0.86    | 0.02   | 0.00   | 0.93   | 0.04        | 0.04   | 0.05   |

Note: \* analyses obtained using JEOL JSM-7001F SEM at SPMU, \*\* using JEOL JSM-6510LA SEM at IPGG RAS. FeO\*, total iron. Structural formulae of spinel  $AB_2O_4$  normalized to 3 cations and 8 charges.  $X_{Hc} = Fe^{2+}/(Fe^{2+} + Mg + Zn)$ ,  $X_{Sp} = Mg/(Fe^{2+} + Mg + Zn)$ ,  $X_{Ghn} = Zn/(Fe^{2+} + Mg + Zn)$ .



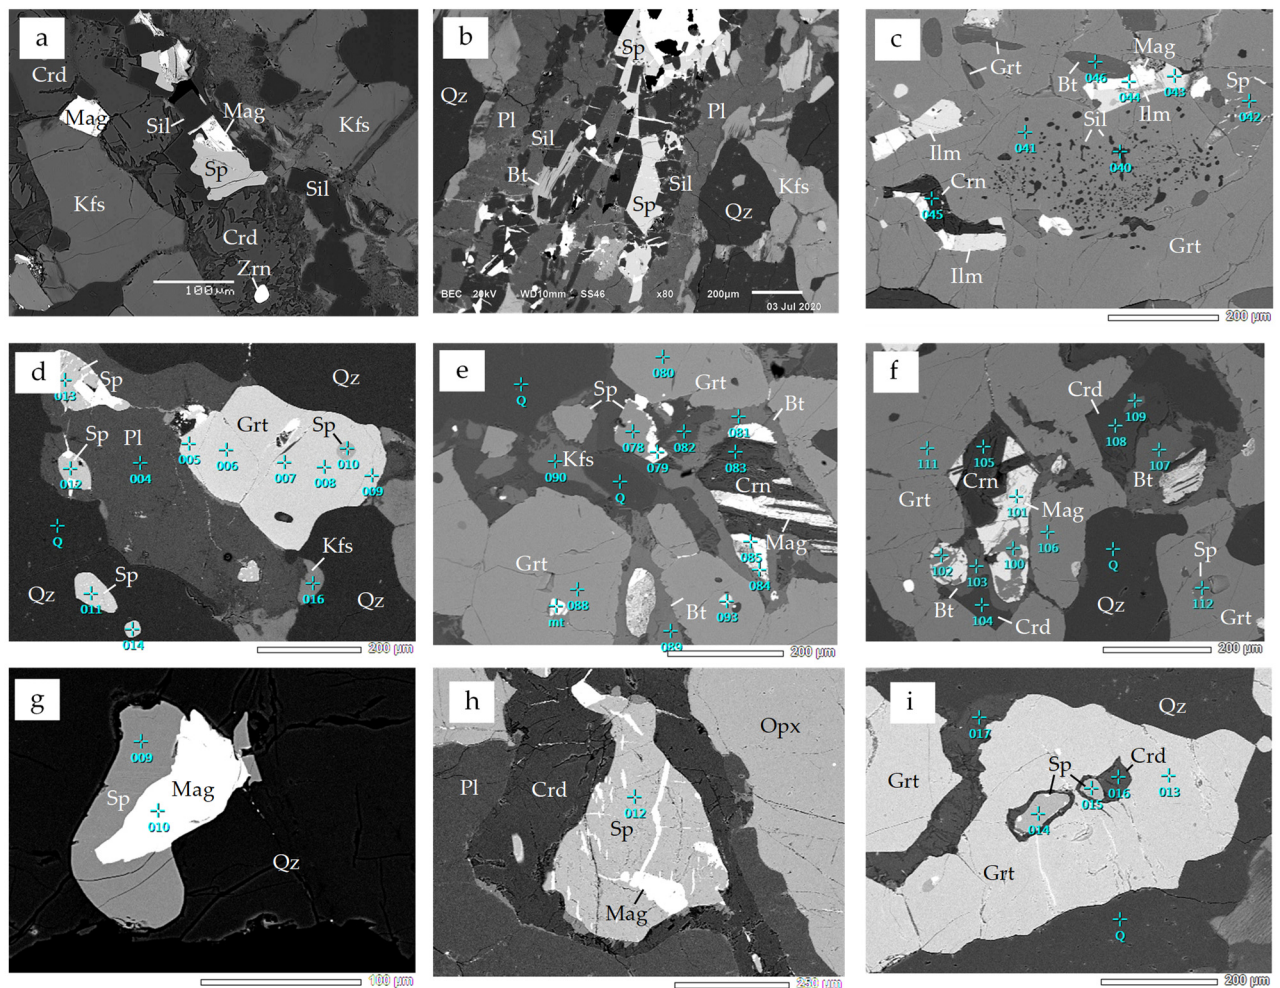

**Figure S4.** Back-scattered electron (BSE) images showing occurrences of analyzed spinel in granulite. (a) Spinel overgrowing on prismatic sillimanite (sample 11a). (b) Spinel overgrowing on prismatic sillimanite (sample 55). (c) Spinel inclusion in garnet (sample 67). (d) Spinel inclusions in garnet and quartz (sample 75). (e) Spinel-magnetite intergrowths in the matrix (sample 78). (f) Spinel inclusion in garnet and spinel intergrowing with magnetite, corundum, and cordierite (sample 78). (g) Spinel-magnetite intergrowth in quartz (sample 61). (h) Spinel partially replaced by magnetite and mantled by cordierite (sample 61). (i) Spinel inclusions in garnet (sample 63).

**Table S6.** Representative analyses of titaniferous magnetite and ilmenite (wt %) in sample 63 and the results of thermobarometry calculations

| Location                       | Intergrowth 1 |        | Intergrowth 2 |        | Intergrowth 3 |        | Intergrowth 4 |        | Intergrowth 5 |        |
|--------------------------------|---------------|--------|---------------|--------|---------------|--------|---------------|--------|---------------|--------|
| Mineral                        | Ti-Mag        | Ilm    |
| Domain                         | Host          | Lamel. |
| Analysis                       | 1-5**         | 1-7**  | 2-5**         | 2-3**  | 3-9**         | 3-7**  | 4-2**         | 4-3**  | 020*          | 021*   |
| SiO <sub>2</sub>               | 0.00          | 0.00   | 0.23          | 0.24   | 0.28          | 0.25   | 0.35          | 0.00   | 0.00          | 0.00   |
| TiO <sub>2</sub>               | 19.65         | 47.87  | 25.57         | 46.34  | 16.14         | 48.43  | 13.99         | 46.36  | 14.10         | 40.72  |
| Al <sub>2</sub> O <sub>3</sub> | 0.00          | 0.00   | 0.29          | 0.00   | 0.00          | 0.00   | 0.00          | 0.00   | 0.00          | 0.00   |
| FeO*                           | 77.01         | 50.33  | 71.85         | 51.43  | 81.59         | 49.06  | 83.80         | 51.01  | 84.67         | 58.48  |
| MnO                            | 0.15          | 0.27   | 0.00          | 0.00   | 0.00          | 0.11   | 0.00          | 0.39   | 0.00          | 0.00   |
| MgO                            | 0.00          | 0.94   | 0.30          | 0.85   | 0.00          | 1.13   | 0.00          | 0.84   | 0.00          | 0.62   |
| CaO                            | 0.00          | 0.00   | 0.00          | 0.00   | 0.00          | 0.00   | 0.00          | 0.00   | 0.00          | 0.00   |
| V <sub>2</sub> O <sub>5</sub>  | 0.85          | 0.00   | 0.94          | 0.67   | 1.34          | 0.55   | 0.87          | 0.57   | 0.00          | 0.00   |
| Total                          | 97.65         | 99.41  | 99.17         | 99.52  | 99.36         | 99.53  | 99.01         | 99.17  | 98.77         | 99.82  |
| Si                             | 0.000         | 0.000  | 0.008         | 0.006  | 0.010         | 0.006  | 0.013         | 0.000  | 0.000         | 0.000  |
| Ti                             | 0.555         | 0.903  | 0.712         | 0.873  | 0.446         | 0.916  | 0.387         | 0.877  | 0.391         | 0.761  |
| Al                             | 0.000         | 0.000  | 0.013         | 0.000  | 0.000         | 0.000  | 0.000         | 0.000  | 0.000         | 0.000  |
| Fe <sup>3+</sup>               | 0.844         | 0.194  | 0.496         | 0.218  | 1.016         | 0.154  | 1.154         | 0.226  | 1.218         | 0.478  |
| Fe <sup>2+</sup>               | 1.573         | 0.862  | 1.729         | 0.859  | 1.492         | 0.878  | 1.423         | 0.847  | 1.391         | 0.738  |
| Mn                             | 0.005         | 0.006  | 0.000         | 0.000  | 0.000         | 0.002  | 0.000         | 0.008  | 0.000         | 0.000  |
| Mg                             | 0.000         | 0.035  | 0.016         | 0.032  | 0.000         | 0.043  | 0.000         | 0.032  | 0.000         | 0.023  |
| V                              | 0.023         | 0.000  | 0.025         | 0.012  | 0.036         | 0.000  | 0.023         | 0.010  | 0.000         | 0.000  |
| Total                          | 3.000         | 2.000  | 3.000         | 2.000  | 3.000         | 2.000  | 3.000         | 2.000  | 3.000         | 2.000  |
| X <sub>Ulv</sub>               | 0.555         |        | 0.712         |        | 0.446         |        | 0.387         |        | 0.391         |        |
| X <sub>Mag</sub>               | 0.422         |        | 0.254         |        | 0.508         |        | 0.577         |        | 0.609         |        |
| X <sub>Ilm</sub>               |               | 0.903  |               | 0.873  |               | 0.916  |               | 0.877  |               | 0.761  |
| X <sub>Hem</sub>               |               | 0.097  |               | 0.109  |               | 0.078  |               | 0.113  |               | 0.239  |
| T <sub>AL85</sub> , °C         | 945           |        | 1245          |        | 830           |        | 870           |        | 960           |        |
| T <sub>SL08</sub> , °C         | 955           |        | 1175          |        | 880           |        | 875           |        | 965           |        |

Note: \* analyses obtained using JEOL JSM-7001F SEM at SPMU, \*\* using JEOL JSM-6510LA SEM at IPGG RAS. FeO\*, total iron. Structural formulae normalized to 3 cations and 8 charges (magnetite) and 2 cations and 6 charges (ilmenite). Magnetite:  $X_{Ulv} = Ti$ ,  $X_{Mag} = Fe^{3+}/2$ . Ilmenite:  $X_{Ilm} = Ti$ ,  $X_{Hem} = Fe^{3+}/2$ .  $T_{AL85}$ ,  $T_{SL08}$ , temperature calculated with Andersen and Lindsley (1985) and Sauerzapf et al. (2008) FeTi-oxide geothermometer/oxygen barometer, respectively [81, 82].

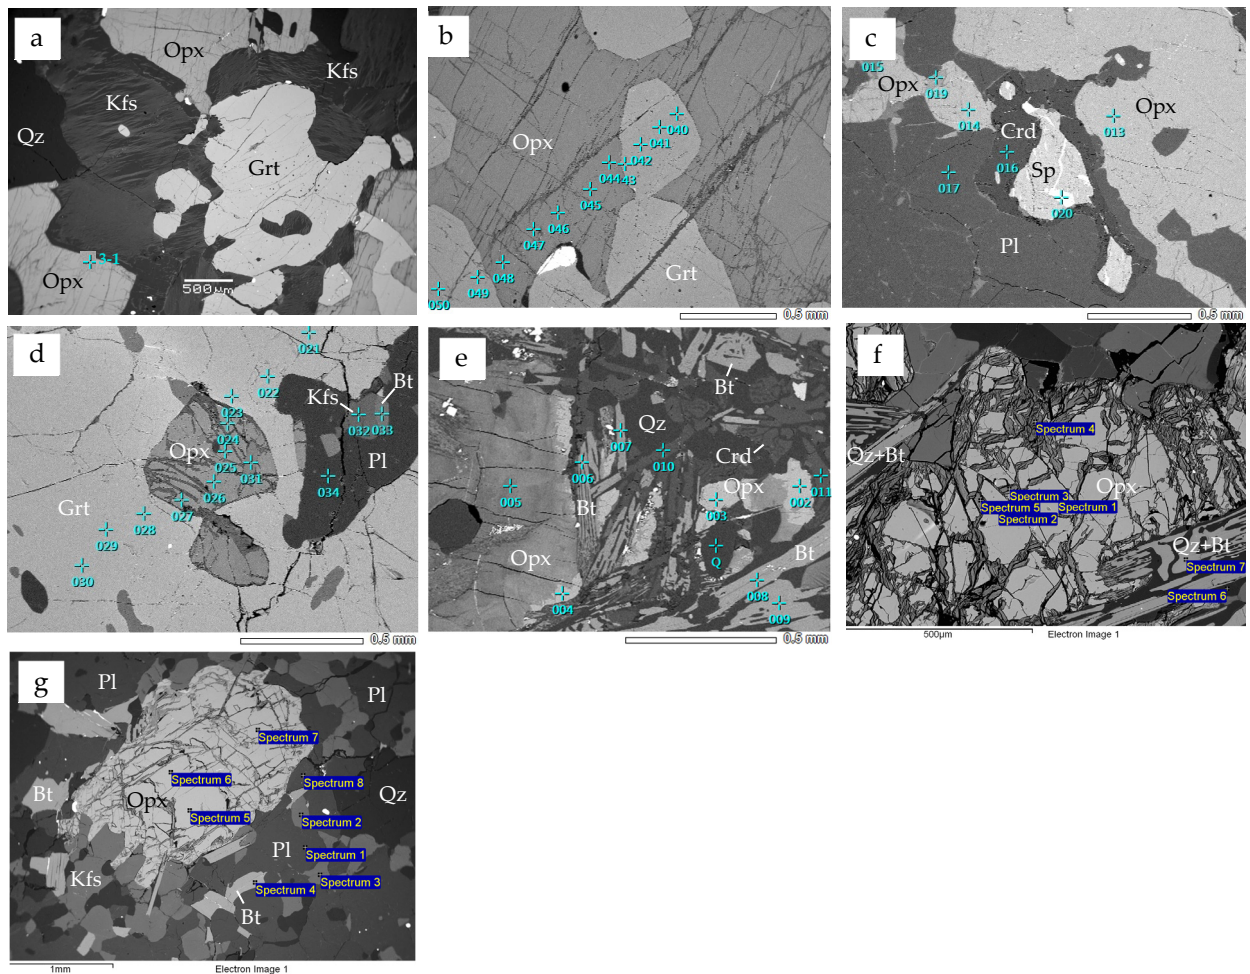

**Figure S5.** Back-scattered electron (BSE) images showing crystals of orthopyroxene with points of microprobe analyses used for thermobarometry. (a) Sample 15, analysis 3-1. (b) Sample 15, analysis 045. (c) Sample 61, analysis 013. (d) Sample 61, analysis 025. (e) Sample 63, analysis 001, 004. (f) Sample 116, analysis 3-2. (g) Sample 116, analysis 4-5.



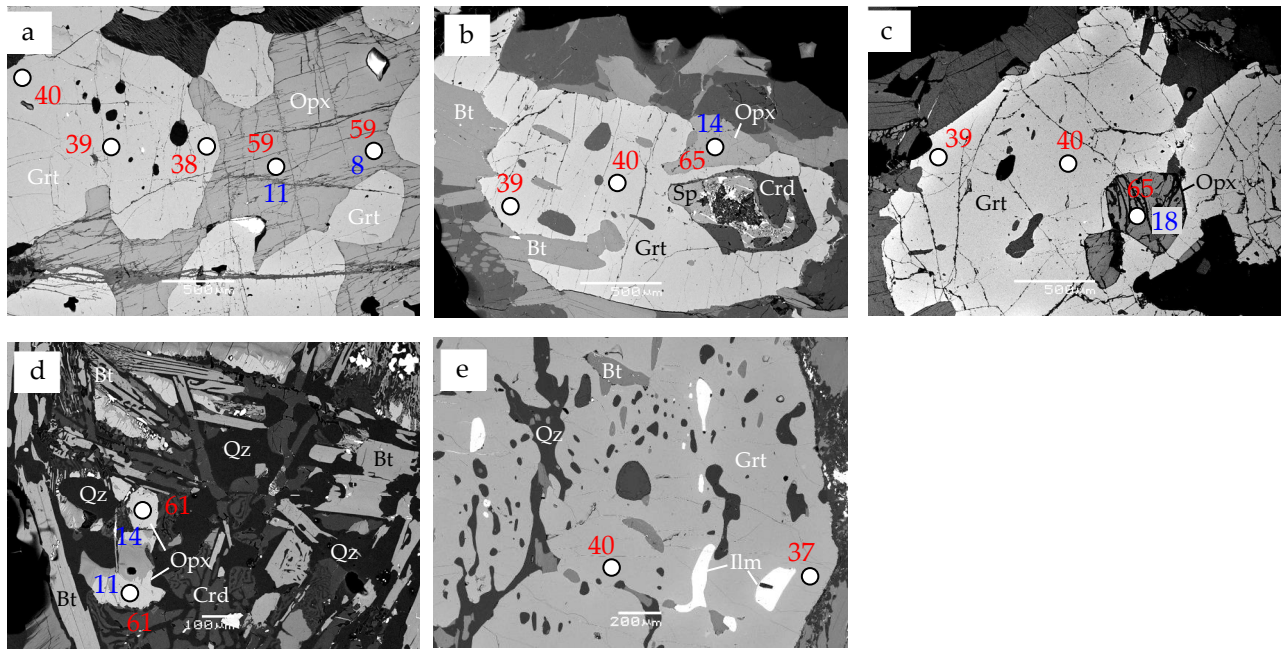

**Figure S6.** Back-scattered electron (BSE) images showing crystals of garnet and orthopyroxene in which major and trace element compositions were measured. (a) Sample 15. (b, c) Sample 61. (d, e) Sample 63. Points with numbers are locations of microprobe analyses. The contents (mol.%) of pyrope in garnet and enstatite in orthopyroxene are shown in red, while the  $X_{Al}^{M1}$  values (mol.%) are shown in blue.
